# Supplementary material
Source: Springer Nature journal article supplement (https://www.springermedizin.de/resource/supplementary/12986_2011_416_MOESM5_ESM.pdf/25656054)

A

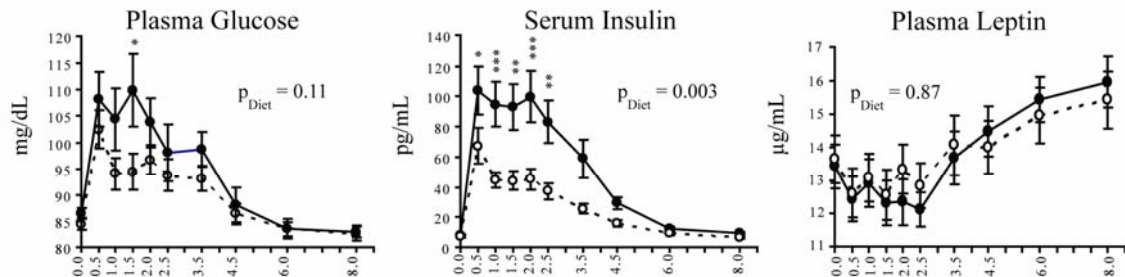

B

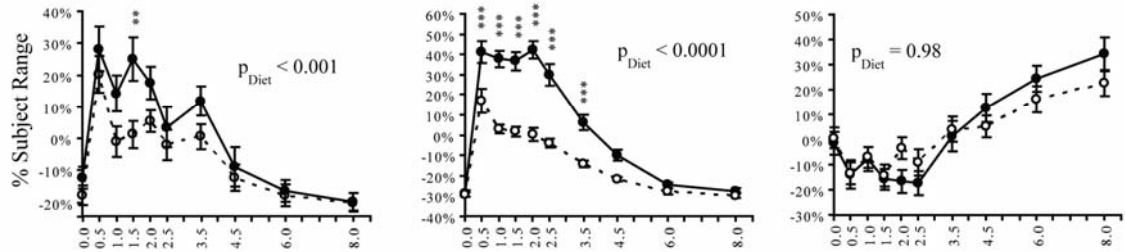

C

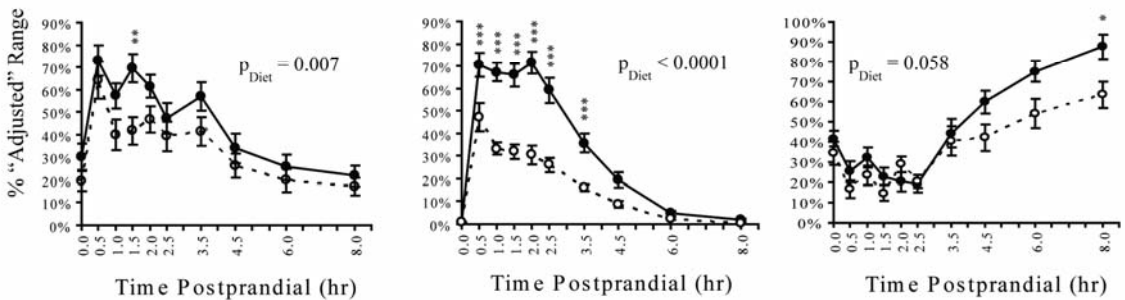

Supplement: MOESM5 [file 25656054]
